# Supplementary material
Source: MDPI journal article supplement (https://www.mdpi.com/2072-4292/15/22/5410)
Supplement: s1 [file s1]

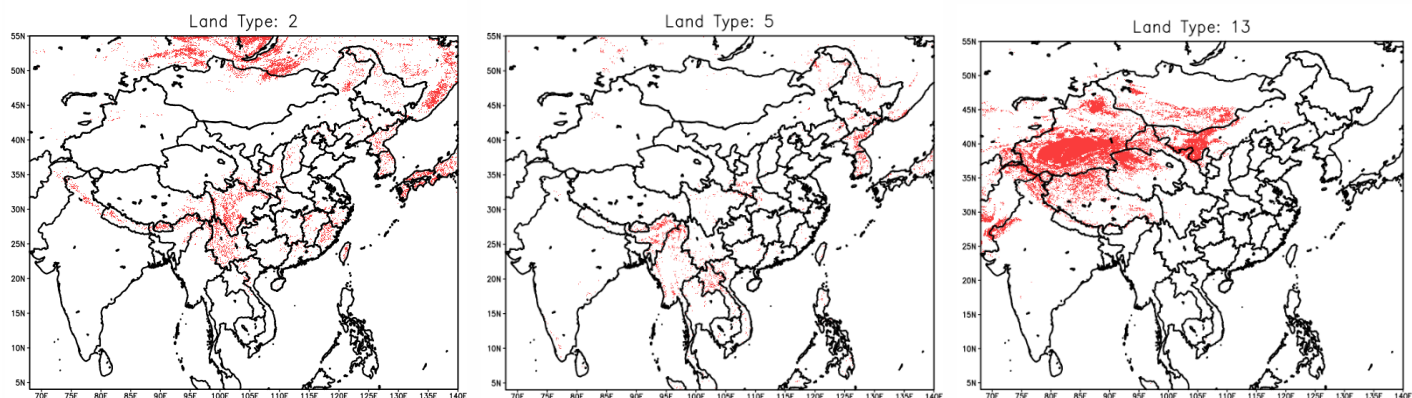

Figure S1. Spatial distributions of land types which show relatively low corrections between FYDI and MCI; Land type 2: Evergreen Needleleaf Forest; Land type 5: Deciduous Broadleaf Forest and Land type 13: Bare Soil

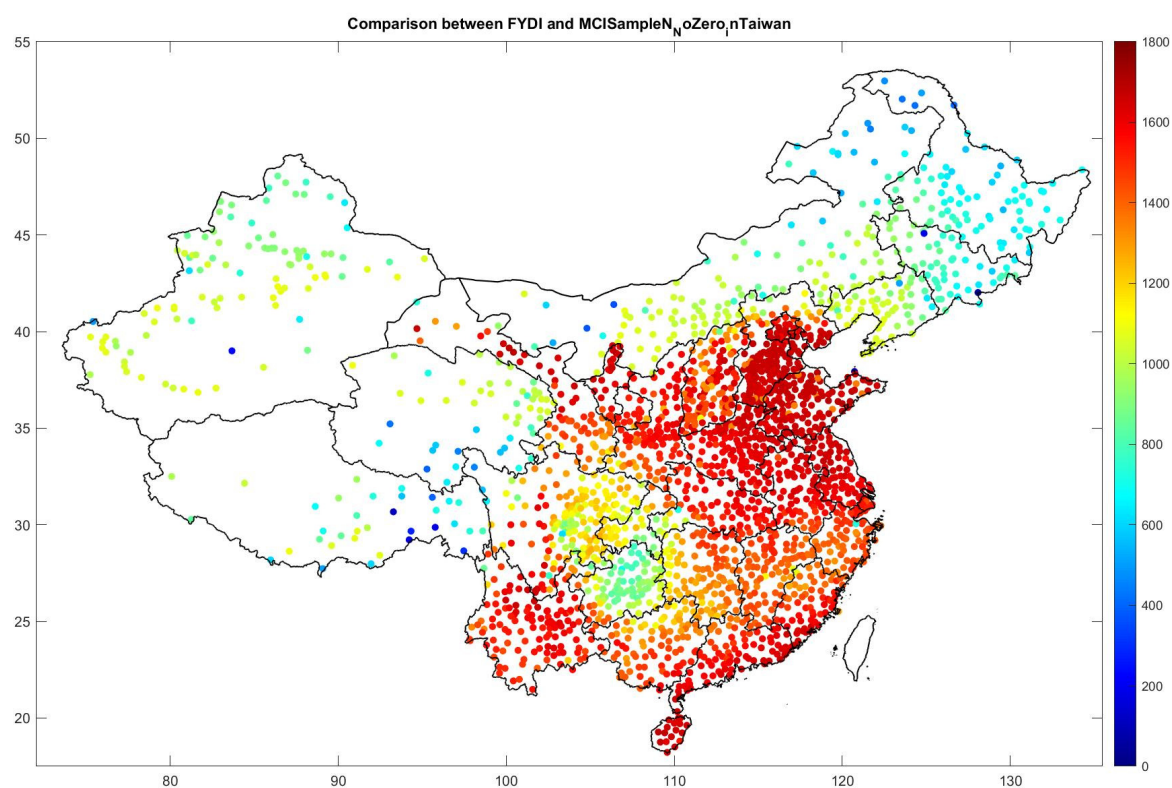

Figure S2. Observation pairs between FYDI and MCI data sets over the period of 2016 to 2020

**Table S1.** Coefficients list of each parameter in the formula of MCI

| Weight coefficients | Parameter                   | Northern and western regions          | Southern region                                               |
|---------------------|-----------------------------|---------------------------------------|---------------------------------------------------------------|
|                     | a                           | 0.3                                   | 0.5                                                           |
|                     | b                           | 0.5                                   | 0.6                                                           |
|                     | c                           | 0.3                                   | 0.2                                                           |
|                     | d                           | 0.2                                   | 0.1                                                           |
| K <sub>a</sub>      | Peak season for crop growth | Early or mature stages of crop growth | Without crop or vegetation growth or perennially arid regions |
|                     | Mar. — Sep.                 | Oct.— Next Feb.                       | Other                                                         |
|                     | 1.0 — 1.2                   | 0.4 — 1.0                             | 0                                                             |
